# Supplementary material for: The causal effect of obesity on prediabetes and insulin resistance reveals the important role of adipose tissue in insulin resistance
Source: PLoS Genet. 2020 Sep 14;16(9):e1009018. doi: 10.1371/journal.pgen.1009018 (PMC7515203; doi:10.1371/journal.pgen.1009018)
Supplement: S9 Table — (XLSX) [file pgen.1009018.s016.xlsx]

## Sheet: S9 Table
S9 Table: Summary statistics of IVs in the MR analysis of obesity (body fat percent) on Matsuda index
SNP	chr	posi	Allele1	Allele0	E_beta	E_se	E_p	O_beta	O_se	O_p
rs4908677	1	7738180	C	T	0.00888017	0.0125939	0.48	-0.0108184	0.015309	0.48
rs58708799	1	42390791	G	T	0.0116707	0.0126507	0.36	0.0118055	0.0153759	0.44
rs61786029	1	49445585	G	T	-0.0323988	0.012593	0.01	0.0252804	0.0153016	0.099
rs12040085	1	49586379	G	A	-0.0254721	0.0125593	0.043	0.0183798	0.0152612	0.23
rs11205625	1	49899702	A	G	-0.0362995	0.0125843	0.0039	0.0250554	0.0152936	0.1
rs12735229	1	50161291	G	A	-0.0364117	0.0125804	0.0038	0.0258378	0.0152889	0.091
rs9659092	1	50443589	G	A	-0.0357849	0.0125991	0.0045	0.0245328	0.0153115	0.11
rs57550775	1	66542025	G	T	0.00228874	0.0126293	0.86	-0.0166014	0.0153457	0.28
rs2797543	1	72701100	A	G	-0.0300384	0.0125428	0.017	0.0249795	0.0152494	0.1
rs12759396	1	72921381	G	A	-0.0260658	0.0133929	0.052	0.00849776	0.0162855	0.6
rs2647503	1	77939418	G	A	-0.0104285	0.0125237	0.41	0.0136005	0.0152224	0.37
rs2800433	1	96998126	A	T	0.000386113	0.0127007	0.98	0.00770512	0.0154365	0.62
rs12077962	1	98446194	C	G	0.0222601	0.0138585	0.11	-0.000145707	0.016846	0.99
rs1318756	1	103340623	T	C	0.00301144	0.0126205	0.81	0.0196881	0.0153404	0.2
rs11205277	1	149892872	G	A	0.021376	0.0132036	0.11	-0.0159628	0.0160488	0.32
rs6587615	1	151699473	C	T	0.00198064	0.0125488	0.87	0.0309043	0.0152521	0.043
rs7525074	1	184681081	A	G	0.0175093	0.0125206	0.16	0.0211391	0.0152213	0.16
rs7543023	1	195041549	C	T	0.0125469	0.0126391	0.32	0.0247876	0.0153616	0.11
rs10920259	1	201797696	T	C	0.0101441	0.012564	0.42	0.000297017	0.0152708	0.98
rs12034581	1	219694903	A	C	-0.0328387	0.0125875	0.0091	0.0234313	0.0153028	0.13
rs10779364	1	219787413	G	C	-0.00352415	0.0125789	0.78	0.00376527	0.0152914	0.81
rs2685229	2	435315	T	C	-0.0271254	0.0128528	0.035	0.00756086	0.0156197	0.63
rs7599695	2	12957361	A	G	-0.00686236	0.0128039	0.59	0.0231118	0.0155621	0.14
rs1077492	2	25286435	C	T	0.0272787	0.0129097	0.035	-0.0037812	0.0156921	0.81
rs935166	2	26949366	A	G	0.0062306	0.0129258	0.63	-0.0216134	0.0157135	0.17
rs72789230	2	36762533	G	A	-0.0108549	0.0128532	0.4	-0.00455109	0.0156247	0.77
rs12991800	2	41624352	T	C	-0.00926765	0.0130939	0.48	0.0266566	0.015914	0.094
rs2174882	2	41655265	G	C	-0.0112568	0.0128488	0.38	0.0257465	0.0156168	0.099
rs935376	2	47039991	A	G	-0.0193488	0.0126665	0.13	0.0195575	0.015396	0.2
rs12713118	2	50832467	G	C	0.00103434	0.0123675	0.93	-0.0414802	0.015028	0.0058
rs77479170	2	62857466	A	G	0.0267129	0.0128964	0.038	-0.00448275	0.0156719	0.77
rs4455176	2	100876629	T	A	0.0208389	0.0124685	0.095	-0.0157604	0.0151591	0.3
rs4850931	2	101005145	C	T	0.0179398	0.0124979	0.15	-0.00299901	0.0151891	0.84
rs435852	2	105404967	C	A	-0.0115171	0.0124527	0.36	0.00298234	0.0151384	0.84
rs3769885	2	165592390	A	G	0.0290979	0.0127897	0.023	-0.0103119	0.0155416	0.51
rs355904	2	165641340	T	A	0.00746273	0.0133949	0.58	0.020338	0.0162828	0.21
rs11893458	2	172895001	A	T	0.0347519	0.0125399	0.0056	-0.0365686	0.0152468	0.016
rs6745626	2	181436641	C	T	-0.00906444	0.0128995	0.48	0.0165194	0.0156871	0.29
rs7557584	2	202972595	G	A	-0.0269873	0.0125335	0.031	0.0431149	0.015232	0.0046
rs969515	2	206059451	G	A	-0.0041269	0.0130803	0.75	-0.00659783	0.0159005	0.68
rs2673127	2	227134379	T	C	-0.0339274	0.0125437	0.0068	-0.0301649	0.0152422	0.048
rs13022070	2	228983870	G	A	0.0194868	0.0126485	0.12	-0.0290841	0.01538	0.059
rs4395245	2	229010927	G	A	-0.017507	0.0127417	0.17	0.0180092	0.0154919	0.25
rs208781	2	230560739	T	C	-0.00199188	0.0131244	0.88	0.0166125	0.0159603	0.3
rs7577278	2	230847856	C	A	0.0231174	0.0125823	0.066	0.00521389	0.0153001	0.73
rs167467	3	12281183	T	C	0.0250282	0.0126557	0.048	-0.0144384	0.0153997	0.35
rs1352941	3	27368425	C	T	0.00480138	0.012526	0.7	-0.0174104	0.01524	0.25
rs7614738	3	49311131	G	C	-0.0166989	0.0124899	0.18	-0.0110363	0.0151994	0.47
rs9821675	3	49902544	G	A	0.0244569	0.0128061	0.056	-0.0162396	0.0155789	0.3
rs7428430	3	50174184	C	T	0.0220262	0.0125104	0.078	-0.026559	0.0152207	0.081
rs9854559	3	71395718	G	A	0.023357	0.0126381	0.065	0.00142487	0.0153829	0.93
rs7647370	3	82633674	C	T	0.0161182	0.0130521	0.22	-0.0271132	0.0158848	0.088
rs17025272	3	86155871	C	T	-0.0192596	0.0126231	0.13	0.0114442	0.015356	0.46
rs9861443	3	88196211	A	C	-0.0260952	0.0134079	0.052	0.00680126	0.0163112	0.68
rs73150107	3	88379888	T	A	-0.010602	0.0127858	0.41	-0.00173096	0.0155545	0.91
rs6781988	3	88727333	C	T	-0.0190962	0.0126827	0.13	0.0127176	0.0154326	0.41
rs9815220	3	88873710	A	G	-0.0118995	0.0125522	0.34	0.00246998	0.0152738	0.87
rs9861554	3	90349123	C	G	0.000301147	0.0126574	0.98	0.0156567	0.0153968	0.31
rs1108682	3	93983821	T	A	-0.0112532	0.0126675	0.37	-0.00898468	0.0154084	0.56
rs10935687	3	94048175	G	A	-0.00500408	0.0125638	0.69	-0.00667297	0.0152839	0.66
rs580585	3	94205768	G	T	0.00791781	0.0128447	0.54	-0.00441891	0.0156226	0.78
rs9867304	3	94248614	T	C	0.00813792	0.0126691	0.52	-0.0154247	0.0154118	0.32
rs10668	3	123211064	G	T	-0.00714542	0.0127152	0.57	-0.00424898	0.0154674	0.78
rs747502	3	131629111	C	G	-0.011144	0.0126436	0.38	0.00498752	0.0153821	0.75
rs7612543	3	141158212	T	G	0.0147129	0.0127414	0.25	0.00774123	0.0155004	0.62
rs6770182	3	153761370	G	A	0.00497051	0.0127645	0.7	-0.00957702	0.0155286	0.54
rs7648169	3	157864041	A	G	0.0213388	0.0133039	0.11	-0.0439866	0.0161917	0.0066
rs12635614	3	173113041	G	A	-0.0225288	0.0123997	0.069	0.0367106	0.0150936	0.015
rs6583310	3	196170985	C	G	0.00317712	0.0135666	0.81	-0.0101618	0.0165059	0.54
rs11730972	4	18370122	G	T	0.00184589	0.0129931	0.89	-0.0353606	0.0157901	0.025
rs1477898	4	18539084	G	C	0.00355941	0.0131082	0.79	-0.0238365	0.0159311	0.13
rs9790808	4	56214596	A	G	-0.00388494	0.01254	0.76	-0.00992811	0.0152335	0.51
rs11724094	4	56367646	A	C	0.00666099	0.012788	0.6	0.00851659	0.0155317	0.58
rs28636474	4	62749901	T	C	0.00357089	0.0128326	0.78	-0.0117554	0.0155876	0.45
rs1903002	4	89740894	C	G	0.019708	0.0126083	0.12	0.00101482	0.0153179	0.95
rs151503	4	103114110	T	C	-0.00616536	0.0124888	0.62	-0.00209885	0.015176	0.89
rs1724551	4	137064123	A	G	0.0197841	0.012604	0.12	0.000103869	0.0153211	0.99
rs2048382	4	140929111	C	T	-0.017806	0.0126727	0.16	0.0138298	0.0153984	0.37
rs6872379	5	52847778	G	A	-0.0188262	0.0129181	0.15	-0.00663761	0.0157061	0.67
rs7736910	5	63040773	A	G	-0.00510958	0.0128306	0.69	-0.026846	0.0155938	0.085
rs7700719	5	74291869	A	G	0.00331366	0.0125082	0.79	-0.0134521	0.0152059	0.38
rs10462511	5	74384115	G	A	-0.00515465	0.0124582	0.68	-0.00207738	0.0151496	0.89
rs4704187	5	74480288	T	C	-0.00915393	0.0125573	0.47	-0.0113818	0.0152715	0.46
rs3846662	5	74651084	G	A	0.00670858	0.0124765	0.59	-0.0124318	0.0151727	0.41
rs258496	5	75042913	A	G	-0.00613271	0.0126091	0.63	0.0159182	0.0153376	0.3
rs1582419	5	103870101	C	T	0.0192243	0.0125743	0.13	-0.0229626	0.0152892	0.13
rs286753	5	107401603	A	T	0.0221693	0.0143386	0.12	-0.0138814	0.0174343	0.43
rs2126165	5	153167595	G	A	-0.0100129	0.0124738	0.42	0.0207403	0.0151672	0.17
rs10042492	5	157923885	C	T	0.00147852	0.0127183	0.91	0.00637699	0.015466	0.68
rs890942	5	158027417	T	C	-0.00902541	0.014868	0.54	-0.014711	0.0180828	0.42
rs12522413	5	170434442	A	G	-0.021268	0.0129564	0.1	0.0143524	0.015752	0.36
rs4701140	5	179034260	G	A	0.0219651	0.0124123	0.077	-0.00707312	0.0150914	0.64
rs1570533	6	1901247	T	C	-0.0115392	0.0131919	0.38	0.0155022	0.0160277	0.33
rs6917995	6	26327814	T	C	0.0192842	0.0128497	0.13	0.00866875	0.0156043	0.58
rs2472928	6	26705549	T	C	0.0084231	0.0134672	0.53	-0.0141938	0.0163597	0.39
rs592229	6	31930441	G	T	0.000306244	0.0143835	0.98	-0.000707844	0.0174697	0.97
rs205283	6	34553048	G	A	0.00622195	0.0131988	0.64	-0.0188436	0.0160412	0.24
rs3800458	6	34663487	A	T	0.00488602	0.0132717	0.71	-0.0158692	0.0161323	0.33
rs9394248	6	34739875	G	A	-0.00301876	0.0132628	0.82	-0.00646178	0.0161214	0.69
rs9469899	6	34793124	A	G	-0.0036073	0.0133266	0.79	-0.0204896	0.0161989	0.21
rs1527706	6	46408365	G	A	-0.0199941	0.0126452	0.11	0.0360785	0.0153702	0.019
rs3899000	6	50972577	T	C	-0.0157295	0.0125718	0.21	0.00807222	0.0152735	0.6
rs9367451	6	51630524	C	T	-0.00886332	0.0127867	0.49	0.0031491	0.0155371	0.84
rs2474896	6	51760527	T	C	-0.0160392	0.0129097	0.21	-0.00741889	0.0156881	0.64
rs34995521	6	70178426	G	A	-0.025052	0.0145534	0.085	0.0298563	0.0176884	0.091
rs2572986	6	70257220	T	C	-0.0313835	0.0165475	0.058	0.0206679	0.0201148	0.3
rs10455352	6	79425591	A	G	0.0105602	0.0127281	0.41	-0.0171734	0.0154611	0.27
rs4580876	6	98322872	A	G	-0.000580305	0.0128821	0.96	0.00517109	0.015659	0.74
rs9490266	6	98418637	T	C	0.0057453	0.0130863	0.66	0.00513878	0.0159001	0.75
rs1872841	6	98576688	C	A	-0.0111001	0.0125008	0.37	0.00665365	0.0151877	0.66
rs4316017	6	127000106	G	T	-0.00951989	0.0125609	0.45	-0.00167785	0.0152573	0.91
rs765875	6	143185683	C	T	0.0198856	0.012979	0.13	0.0100975	0.0157659	0.52
rs1183079	7	2904672	A	G	-0.000743563	0.0127347	0.95	-0.026742	0.0154795	0.084
rs4723841	7	39329539	G	A	0.0013763	0.0124948	0.91	0.00627634	0.0151893	0.68
rs848449	7	77527456	A	G	-0.00454024	0.0128284	0.72	0.0141076	0.015596	0.37
rs1621442	7	112934140	G	C	0.00868806	0.0124456	0.49	-0.0106325	0.0151363	0.48
rs12154627	7	130422934	C	T	-0.0159964	0.012483	0.2	0.0178865	0.0151826	0.24
rs4493874	8	10577418	T	A	-0.0107765	0.014009	0.44	0.00227054	0.0170258	0.89
rs62508302	8	30831329	T	C	-0.00378824	0.0125314	0.76	0.00475488	0.0152282	0.75
rs7833571	8	73494858	C	T	0.00853177	0.0129858	0.51	-0.000350449	0.015778	0.98
rs1381660	8	76873699	G	A	-0.00621891	0.0126906	0.62	-0.00452569	0.0154235	0.77
rs2383968	8	77104578	A	C	0.0198406	0.0126835	0.12	0.00385064	0.0154146	0.8
rs11781016	8	87529297	C	A	0.0111864	0.0126601	0.38	0.0128761	0.0153889	0.4
rs13277568	8	116679547	A	G	0.00293135	0.0125633	0.82	0.00692043	0.0152702	0.65
rs10088006	8	122665121	A	G	0.0117408	0.0125539	0.35	-0.0244515	0.0152608	0.11
rs11496297	9	11305190	G	A	-0.019196	0.0125347	0.13	0.00139962	0.0152296	0.93
rs2165864	9	11579598	T	C	-0.02013	0.0133998	0.13	0.020065	0.0162861	0.22
rs10960100	9	11696250	T	A	-0.00261403	0.014337	0.86	0.0122731	0.0174111	0.48
rs6474962	9	15747795	G	A	0.0155832	0.0126859	0.22	-0.00744049	0.0154055	0.63
rs56401042	9	15806573	C	T	0.00649228	0.0126724	0.61	-0.00231807	0.015387	0.88
rs2987008	9	15963303	C	T	-0.00146756	0.0130462	0.91	-0.0138015	0.0158379	0.38
rs3008707	9	16033416	T	C	0.0178242	0.0126972	0.16	-0.017781	0.0154174	0.25
rs7041128	9	28420020	G	A	-0.00942038	0.0127536	0.46	0.0207223	0.0154853	0.18
rs7357754	9	92207308	A	G	-0.00681195	0.0125724	0.59	0.0243005	0.015278	0.11
rs4837119	9	129672095	T	A	-0.00878513	0.0129216	0.5	0.00692454	0.0157003	0.66
rs1243199	10	21950592	A	G	0.0027747	0.0125214	0.82	0.00271336	0.0152123	0.86
rs55706416	10	70343987	C	T	-0.000157686	0.0128493	0.99	0.010939	0.0156192	0.48
rs10788495	10	88113615	A	T	0.00655832	0.0126088	0.6	-0.0347152	0.0153245	0.023
rs726525	10	118604186	T	C	-0.0146634	0.0128312	0.25	0.0183203	0.0155908	0.24
rs871883	10	134013856	T	G	-0.00329695	0.0125668	0.79	0.00690793	0.015274	0.65
rs2015629	11	8564426	T	A	-0.0265139	0.012565	0.035	0.0204752	0.0152986	0.18
rs4929942	11	8625096	A	G	-0.0262812	0.0125692	0.037	0.0216618	0.0153037	0.16
rs7111072	11	10137509	T	C	-0.0163193	0.0124891	0.19	0.0110923	0.0151951	0.47
rs7117816	11	10406925	T	C	0.0124464	0.0124841	0.32	0.000148161	0.0151921	0.99
rs7479309	11	27311814	G	A	0.00864532	0.0125719	0.49	0.00114852	0.0152962	0.94
rs11606658	11	43795420	C	T	-0.00953373	0.012603	0.45	0.02255	0.0153349	0.14
rs11039216	11	47406592	T	C	-0.0110976	0.013369	0.41	0.0122335	0.0162701	0.45
rs7107356	11	47676170	G	A	-0.0226988	0.0142317	0.11	0.00800428	0.0173207	0.64
rs12790666	11	47983477	G	A	-0.0387126	0.0136506	0.0046	0.0270081	0.0166139	0.1
rs12365485	11	67302582	C	A	0.0156399	0.0128016	0.22	-0.0227745	0.0155758	0.14
rs11214589	11	113245048	A	G	-0.00546985	0.0128766	0.67	0.013869	0.015662	0.38
rs2324316	11	130872353	T	G	0.0299622	0.0126772	0.018	-0.0133455	0.0154258	0.39
rs34453616	11	134535457	G	C	-0.00252253	0.0155385	0.87	-0.0267353	0.0189152	0.16
rs10785265	12	41813207	A	G	0.00365571	0.0125494	0.77	0.00136832	0.0152534	0.93
rs1458157	12	41886146	A	G	0.0110901	0.0125027	0.38	-0.00107	0.0151988	0.94
rs11169182	12	50248052	T	C	0.00683372	0.0124486	0.58	-0.0259082	0.0151374	0.087
rs2279574	12	89745477	C	A	0.0210609	0.013011	0.11	-0.0290778	0.0158275	0.066
rs10858948	12	90478651	G	A	0.0132145	0.0125629	0.29	-0.0238846	0.0152807	0.12
rs6539357	12	108072102	T	C	0.0112511	0.0126226	0.37	-0.00555416	0.0153581	0.72
rs7304061	12	108322618	C	T	-0.00507759	0.0129132	0.69	-0.0114582	0.0157044	0.47
rs10746120	12	108591771	A	T	0.00505083	0.0129159	0.7	-0.0118664	0.0157043	0.45
rs1976859	12	122488014	T	C	0.021737	0.0127278	0.088	0.00691752	0.0154769	0.65
rs11058587	12	122646871	G	A	0.0318382	0.0128114	0.013	-0.00149136	0.0155758	0.92
rs10161184	12	122812291	G	A	0.0191429	0.0131361	0.15	-0.00610465	0.0159852	0.7
rs11610303	12	122993932	G	T	0.0175585	0.0127422	0.17	-0.0163778	0.0154986	0.29
rs7953894	12	123404966	A	C	0.021145	0.0125374	0.092	-0.0243938	0.0152537	0.11
rs10773048	12	124444409	T	C	0.0069458	0.0131377	0.6	0.0187361	0.0159769	0.24
rs825500	12	124580988	C	T	-0.00352455	0.0128027	0.78	-0.0107827	0.0155677	0.49
rs12427676	13	33382028	G	A	-0.00826308	0.0125762	0.51	0.0278773	0.015293	0.068
rs9601149	13	79566442	C	G	0.000495814	0.0131619	0.97	-0.0229334	0.0160024	0.15
rs2225857	13	86336969	A	G	-0.00238332	0.0128593	0.85	-3.11216e-05	0.0156371	1
rs2149266	13	86358118	T	C	0.000134588	0.0128842	0.99	-0.00301207	0.0156674	0.85
rs2031237	13	99109319	A	C	-0.00318824	0.0136714	0.82	0.0135162	0.0166125	0.42
rs2026174	13	112179953	C	T	0.0285513	0.0125903	0.023	-0.0172273	0.0153086	0.26
rs10145461	14	33298330	T	G	-0.0355229	0.0124628	0.0044	0.0358899	0.0151508	0.018
rs8004367	14	46846812	T	C	-0.00140382	0.0125298	0.91	-0.0156178	0.0152363	0.31
rs12879453	14	47309879	A	G	-0.00787223	0.0129402	0.54	-0.00656851	0.0157371	0.68
rs7141420	14	79899454	C	T	0.00464174	0.0126532	0.71	0.000105617	0.0153905	0.99
rs55882426	14	94120712	T	C	0.0167255	0.0124181	0.18	-0.00294933	0.0150955	0.85
rs911549	14	103984537	T	C	-0.00246362	0.0127736	0.85	0.0044368	0.0155425	0.78
rs34482222	15	31692377	C	T	0.00982883	0.0128566	0.44	-0.00558909	0.0156383	0.72
rs11630743	15	51750609	C	T	0.00993784	0.0125244	0.43	-0.0146187	0.0152361	0.34
rs149605042	15	51885446	A	G	-0.00894703	0.0125144	0.47	0.0214421	0.0152244	0.16
rs8033234	15	51956117	T	C	0.0103622	0.0126821	0.41	-0.0167465	0.0154296	0.28
rs72747464	15	67818540	T	C	-0.015929	0.0125159	0.2	-0.00603204	0.0152247	0.69
rs2127162	15	68090824	A	C	-0.0149189	0.012687	0.24	0.035475	0.0154333	0.022
rs7495199	15	73128880	C	T	-0.0164999	0.0125058	0.19	0.00247699	0.0152123	0.87
rs2585058	15	84284552	A	G	-0.00202837	0.0125916	0.87	0.0260618	0.0153114	0.089
rs7181926	15	84549428	C	G	0.0356992	0.0126301	0.0047	-0.017989	0.0153608	0.24
rs11637866	15	84587958	C	T	-0.0290282	0.0126219	0.021	0.0159046	0.0153525	0.3
rs28635520	15	84789309	C	T	-0.00800335	0.0127051	0.53	0.00406389	0.0154544	0.79
rs7169728	15	95273041	T	C	-0.00577678	0.0135843	0.67	0.0331631	0.0165289	0.045
rs71402568	16	4836155	GT	G	0.0147882	0.0126132	0.24	-0.0139727	0.0153389	0.36
rs28709965	16	28299132	A	G	-0.00647059	0.0126501	0.61	0.0116665	0.0153848	0.45
rs558548	16	28575899	C	T	-0.0294877	0.0126124	0.019	0.0322729	0.015343	0.035
rs62037364	16	28868695	A	G	0.0395397	0.0125494	0.0016	-0.0374953	0.0152648	0.014
rs2911213	16	30324494	T	C	-0.0145095	0.012645	0.25	0.0181739	0.0153854	0.24
rs11075987	16	53815161	G	T	0.0239948	0.0126219	0.057	-0.0112622	0.0153457	0.46
rs12149525	16	64687919	G	A	-7.84859e-06	0.0125272	1	-0.00233194	0.0152318	0.88
rs4985407	16	70285901	A	G	-0.0134384	0.0129124	0.3	0.0140264	0.0157108	0.37
rs811052	16	72252363	C	A	-0.00930104	0.0128258	0.47	0.00936706	0.0156044	0.55
rs9932307	16	89886905	C	T	0.0134225	0.0124655	0.28	-0.0166026	0.0151617	0.27
rs9646401	17	1864749	C	T	0.000396734	0.0124717	0.97	-0.0160326	0.0151647	0.29
rs8078135	17	21268583	T	C	0.011673	0.0124829	0.35	-0.00185027	0.0151765	0.9
rs7209622	17	28256807	G	C	-0.00643608	0.012508	0.61	-0.012415	0.015202	0.41
rs7213076	17	28419428	G	A	-0.00274137	0.01259	0.83	-0.0107124	0.0153037	0.48
rs11657469	17	34876195	T	A	0.000205111	0.0127794	0.99	0.0121722	0.0155366	0.43
rs7502890	17	43152675	G	A	-0.0105587	0.0134553	0.43	0.0185832	0.0163655	0.26
rs4794015	17	47067826	A	G	-0.00711827	0.0132941	0.59	0.0486936	0.0161681	0.0026
rs9913551	17	61851588	T	C	-0.0033668	0.0125769	0.79	-0.0167126	0.015297	0.27
rs8079078	17	65821166	C	A	0.023194	0.0132542	0.08	-0.0529608	0.016121	0.001
rs7215687	17	66144402	G	A	0.0156833	0.0125804	0.21	-0.0319116	0.0153	0.037
rs4889775	17	78592287	G	A	-0.0212514	0.0136224	0.12	0.0157351	0.0165678	0.34
rs35867081	17	79047278	A	G	0.0206365	0.0125534	0.1	-0.0124943	0.0152604	0.41
rs1788783	18	21161134	C	T	0.0136099	0.0126484	0.28	-0.0109711	0.015388	0.48
rs310093	18	40867411	A	C	0.0136121	0.0126583	0.28	-0.011576	0.0153989	0.45
rs4603671	18	57761047	A	G	0.0112713	0.0128337	0.38	-0.00914736	0.0156009	0.56
rs752720	18	57915969	C	T	0.0264051	0.0126373	0.037	-0.0209802	0.0153684	0.17
rs10871590	18	63318342	A	G	0.0345426	0.0124287	0.0054	-0.0143925	0.0151149	0.34
rs7250425	19	18201757	C	T	0.0377519	0.0128166	0.0032	-0.0433545	0.0155835	0.0054
rs11878507	19	18837823	G	A	0.0121926	0.0126378	0.33	-0.0217447	0.0153693	0.16
rs11672697	19	33876955	C	T	-0.00617895	0.0125631	0.62	-0.0138004	0.015274	0.37
rs10425678	19	33977396	T	C	0.000702833	0.0124545	0.95	-0.00990562	0.0151432	0.51
rs62136855	19	47563751	T	C	0.00393774	0.012801	0.76	-0.0153336	0.0155668	0.32
rs6050463	20	25208990	G	A	-0.00813936	0.0124957	0.51	0.016617	0.0151924	0.27
rs9927	20	25277244	G	A	0.0122128	0.0124796	0.33	-0.0234961	0.0151705	0.12
rs869358	20	25374674	G	A	-0.00759031	0.0125628	0.55	0.0201972	0.0152709	0.19
rs390123	20	25480105	C	G	-0.00747654	0.012562	0.55	0.0204186	0.0152698	0.18
rs6095298	20	47413079	G	A	-0.00807975	0.013127	0.54	0.00916654	0.0159675	0.57
rs6012557	20	47531154	C	G	-0.00865895	0.0137673	0.53	0.016699	0.0167446	0.32
rs6068203	20	51086643	C	T	-0.016761	0.0135499	0.22	0.0288234	0.0164756	0.08
rs3810496	20	62406886	T	C	-0.00585673	0.0128435	0.65	0.00881298	0.0156214	0.57
rs6011169	20	62456818	C	G	-0.00560552	0.0199703	0.78	0.0347272	0.0242973	0.15
rs9680376	21	46583406	G	A	-0.0305474	0.0126763	0.016	0.0220622	0.0154162	0.15
rs2235346	22	38518229	T	G	0.00452397	0.0125766	0.72	0.0114403	0.0152864	0.45
rs9610915	22	38611080	C	G	0.020728	0.0126539	0.1	-0.000596249	0.0153844	0.97
rs13057907	22	41714912	G	A	-0.00116032	0.0124292	0.93	-0.031037	0.0151142	0.04
rs738140	22	41884954	G	A	-0.00722111	0.0131509	0.58	0.0127185	0.0159847	0.43
rs6002503	22	42208672	G	A	0.0119935	0.0133353	0.37	-0.0285907	0.0162191	0.078
rs5768657	22	48873919	T	C	-0.00953581	0.0124813	0.44	0.0201116	0.0151816	0.19
